# Supplementary material for: Physicians’ and patients’ perceived risks of chronic pain medication and co-medications in Quebec, Canada: a cross-sectional study
Source: Springer Nature journal article supplement (doi:10.1186/s12875-025-02704-5), 2025-01-14
Supplement: MOESM1 [file 12875_2025_2704_MOESM1_ESM.pdf]

Additional file 1

The items of the MSQ-4.0, including examples of various medications in each subclass.

| <b>MEDICATION SUBCLASS</b>                                                                 | <b>EXAMPLE OF MEDICATIONS</b>                                                                                                                |
|--------------------------------------------------------------------------------------------|----------------------------------------------------------------------------------------------------------------------------------------------|
| NSAIDs – selective cyclooxygenase 2 inhibitors (COX-2)                                     | celecoxib (Celebrex®)                                                                                                                        |
| NSAIDs – salicylates                                                                       | acetylsalicylic acid (ASA, Aspirin®)                                                                                                         |
| Other oral NSAIDs                                                                          | ibuprofen (Advil®, Motrin®), naproxen (Naprosyn®), diclofenac, ketoprofen, meloxicam, piroxicam                                              |
| NSAIDs – Topical agents                                                                    | diclofenac sodium (Pennsaid®), diclofenac diethylamine (Voltaren Emulgel®)                                                                   |
| Various topical agents                                                                     | various magistral preparations, ketamine cream, benzocaine, lidocaine (Emla®), capsaicin (Zostrix®), Antiphlogistine®, Myoflex®, Tiger Balm® |
| Acetaminophen                                                                              | Tylenol®                                                                                                                                     |
| Acetaminophen in combination with an opioid                                                | acetaminophen with codeine (Tria-tec-30®, Empracet®), with tramadol (Tramacet®) or with oxycodone (Percocet®)                                |
| Short-acting opioids                                                                       | codeine, fentanyl, hydromorphone, morphine, oxycodone                                                                                        |
| Long-acting opioids                                                                        | methadone, extended release formulations (Codeine Contin®, OxyContin®, Hydromorph Contin®, Journista®, MS Contin®, Duragesic®)               |
| Opioids associated with norepinephrine reuptake inhibition                                 | tramadol, tapentadol                                                                                                                         |
| Partial opioid receptor agonists                                                           | buprenorphine (Butrans®), butorphanol                                                                                                        |
| Opioids in combination with an opioid receptor antagonist                                  | buprenorphine/naloxone (Suboxone®), oxycodone/naloxone (Targin®)                                                                             |
| Anticonvulsants – Calcium channel blockers (gabapentinoids)                                | pregabalin (Lyrica®), gabapentin (Gabapentin®)                                                                                               |
| Anticonvulsants – Sodium channel blockers                                                  | oxycarbazepine, Lamotrigine (Lamictal®)                                                                                                      |
| Anticonvulsants – Other                                                                    | Levetiracetam (Keppra®), topiramate (Topamax®)                                                                                               |
| Antidepressants – Serotonin norepinephrine reuptake inhibitors (SNRIs)                     | duloxetine (Cymbalta®), venlafaxine (Effexor XR®)                                                                                            |
| Antidepressants – Selective serotonin reuptake inhibitors (SSRIs)                          | citalopram (Celexa®), escitalopram, fluvoxamine (Luvox®), fluoxetine (Prozac®), paroxetine (Paxil®), sertraline (Zoloft®)                    |
| Antidepressants – Serotonin reuptake inhibitors and 5-HT <sub>2</sub> receptor antagonists | trazodone                                                                                                                                    |
| Antidepressants – Specific noradrenergic and serotonergic                                  | mirtazapine (Remeron®)                                                                                                                       |
| Antidepressants – Tricyclic                                                                | amitriptyline (Elavil®), nortriptyline (Aventyl®), desipramine                                                                               |
| Antidepressants – Miscellaneous                                                            | bupropion (Wellbutrin®)                                                                                                                      |

|                                                                          |                                                                                                                                                              |
|--------------------------------------------------------------------------|--------------------------------------------------------------------------------------------------------------------------------------------------------------|
| Antipsychotics                                                           | aripiprazole, chlorpromazine, clozapine, haloperidol, olanzapine (Zyprexa®), quetiapine (Seroquel®)                                                          |
| Barbiturates                                                             | phenobarbital, primidone                                                                                                                                     |
| Benzodiazepines                                                          | lobazam, clonazepam (Rivotril®), alprazolam (Xanax®), bromazepam, chlordiazepoxide, diazepam (Valium®), flurazepam, lorazepam (Ativan®), midazolam, oxazepam |
| Various anxiolytics, sedatives, and hypnotics                            | bupirone, hydroxyzine (Atarax®), promethazine, zopiclone, zolpidem tartrate                                                                                  |
| Centrally acting skeletal muscle relaxants                               | cyclobenzaprine (Flexeril®), methocarbamol (Robax®)                                                                                                          |
| GABA-Derivative skeletal muscle relaxants                                | baclofen (Lioresal®)                                                                                                                                         |
| Miscellaneous muscle relaxants                                           | orphenadrine (Norflex®)                                                                                                                                      |
| Synthetic cannabinoid (under prescription)                               | nabilone (Cesamet®)                                                                                                                                          |
| Medical/therapeutic cannabis                                             | vaporized, vaped, oral, oromucosal, topical                                                                                                                  |
| Antimigraine agents – 5HT-1 receptor agonists (triptans)                 | sumatriptan (Imitrex®)                                                                                                                                       |
| Antimigraine agents – Calcitonin gene-related peptide (CGRP) Antagonists | erenumab (Aimovig®)                                                                                                                                          |
| Antimigraine agents – Miscellaneous                                      | pizotifen (Sandomigran®)                                                                                                                                     |
| Corticosteroids – Oral                                                   | prednisone, prednisolone                                                                                                                                     |
| Clonidine (antihypertensive)                                             |                                                                                                                                                              |
| Mexiletine (antiarrhythmics)                                             |                                                                                                                                                              |
